# Supplementary material for: Cumulative Scoring Systems and Nomograms for Predicating Survival in Patients With Glioblastomas: A Study Based on Peripheral Inflammatory Markers
Source: PubMed Central journal article supplement (PMC9198436; doi:10.3389/fonc.2022.716295), 2022-06-01

**Supplemental Figure S1.** ROC and AUC value of peripheral inflammatory markers of NLR, PLR, LMR, AGR and score system of AGR-NLR, AGR-LMR, LMR-NLR and LMR-NLR-AGR.

**A**

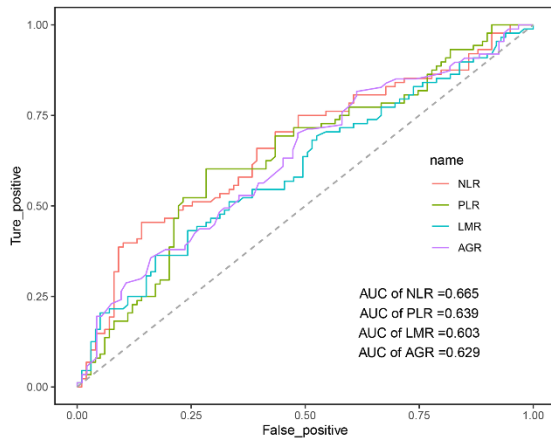

**B**

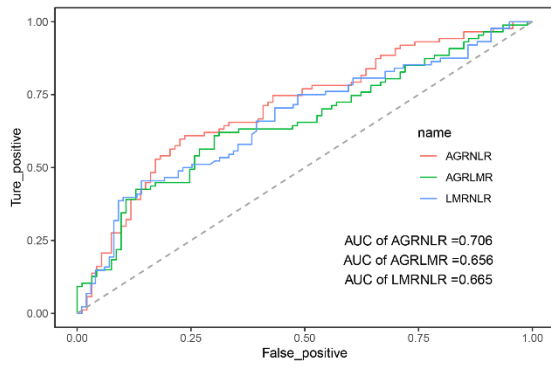

**C**

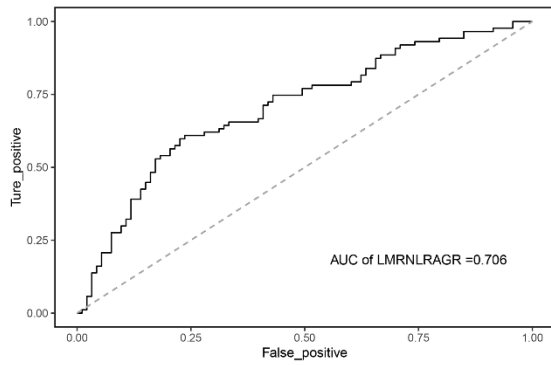

**Supplemental Figure S2.** Cutoff values of peripheral markers in GBM patients. Neutrophil, lymphocyte, platelet: 109 cells/L; albumin: g/L.

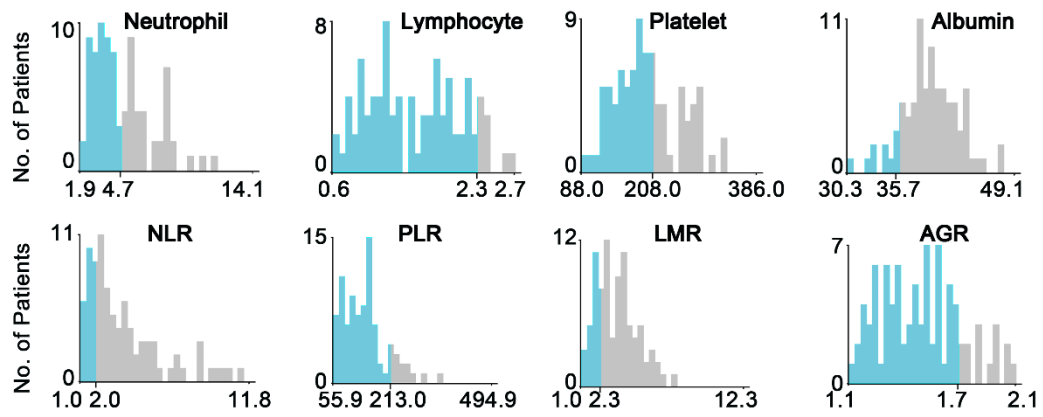

**Supplemental Figure S3.** Kaplan-Meier survival curves of GBM patients based on the cutoff values of neutrophil, lymphocyte, platelet, and PLR values.

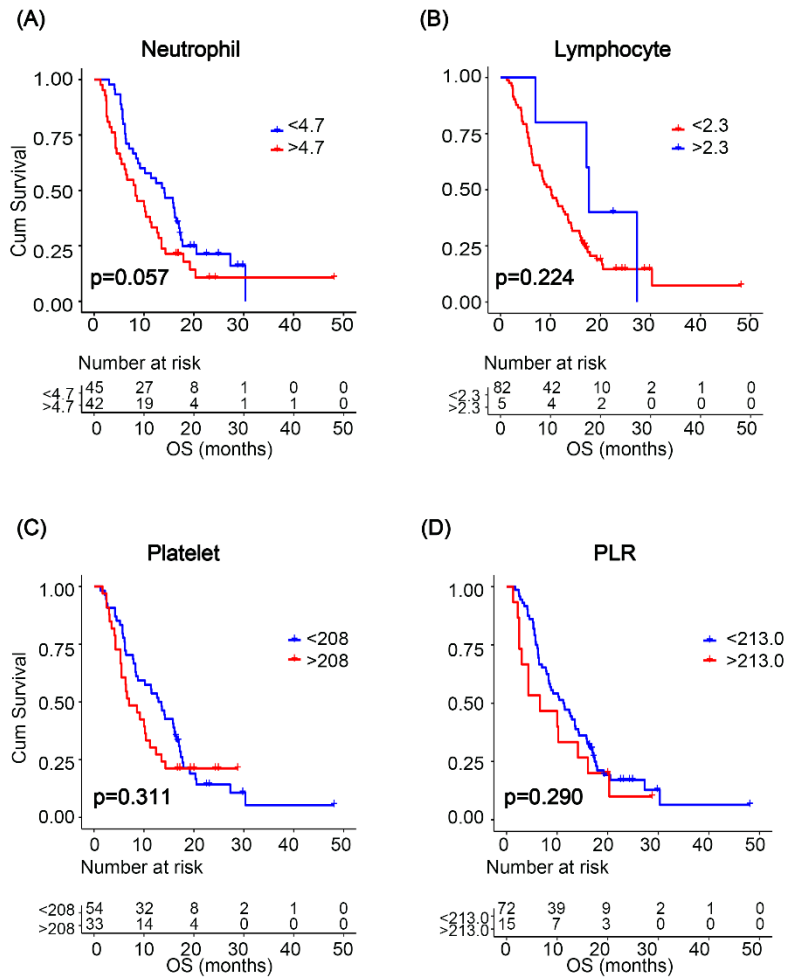

**Supplemental Figure S4.** Correlation analysis among NLR, LMR, and AGR.

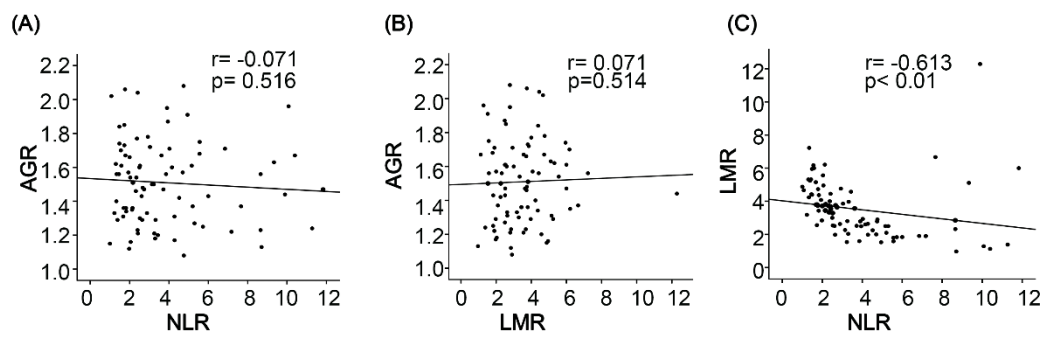

**Supplemental Figure S5.** Kaplan-Meier survival curves of GBM patients based on the IDH 1 and MGMT status.

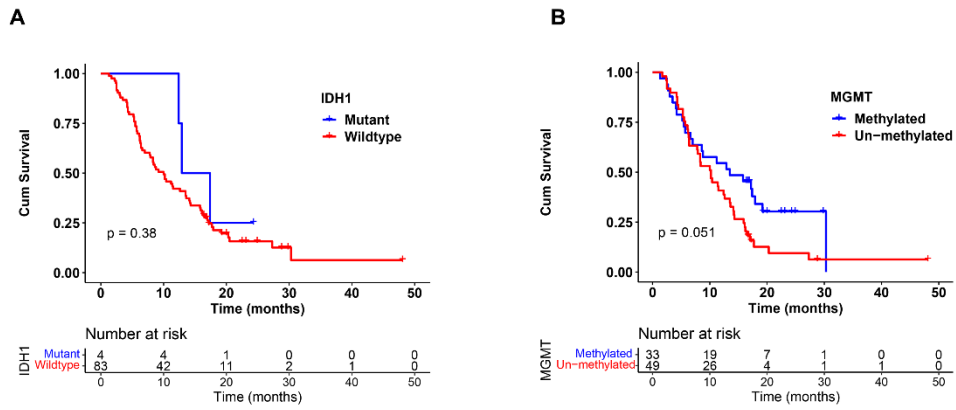

**Supplemental Figure S6.** Time-dependent ROC curve analysis of three prognostic scoring models for predicting OS in GBM patients.

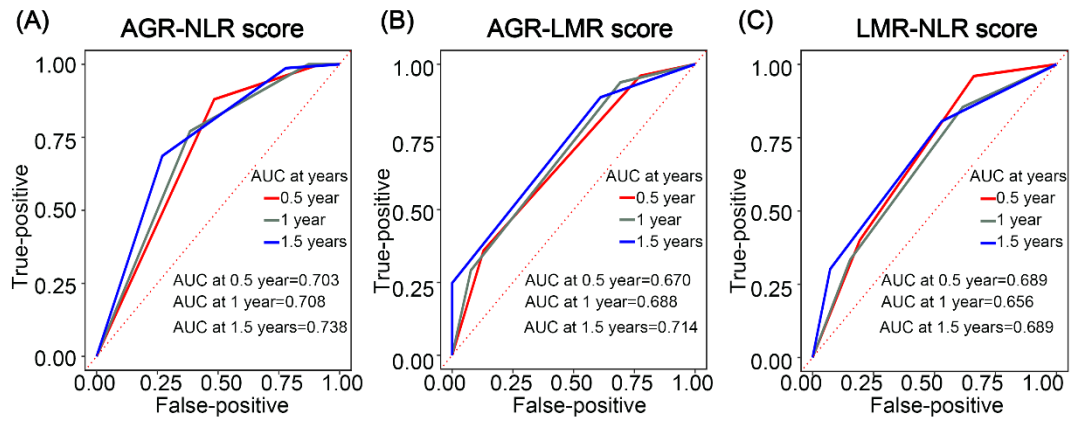

Supplement: DataSheet_2.pdf [file DataSheet_2.pdf]
